# Supplementary material for: Targeted variant detection using unaligned RNA-Seq reads
Source: Life Sci Alliance. 2019 Aug 19;2(4):e201900336. doi: 10.26508/lsa.201900336 (PMC6701478; doi:10.26508/lsa.201900336)
Supplement: Supplementary file 1 [file LSA-2019-00336_TableS1.xlsx]

## Sheet: Feuille 1 - Table S1_ Details o
Suppl. table 1: Details of TCGA mutated samples on IDH1.
	Tumour	km	GDC portal			Tumour	km	GDC portal
R132C: g/A	AML	8	9		R132H: c/T	AML	2	4
	BLCA	1	1			BLCA	1	1
	BRCA	1	1			BRCA	1	1
	CHOL	3	4			CHOL	0	0
	COAD	2	1			COAD	0	0
	GBM	0	1			GBM	8	23
	LGG	11	17			LGG	317	358
	LIHC	2	2			LIHC	0	0
	LUAD	1	1			LUAD	0	0
	PCPG	0	1			PCPG	0	0
	PRAD	1	2			PRAD	1	1
	SARC	1	1			SARC	0	0
	SKCM	12	15			SKCM	0	0
	THYM	1	1			THYM	0	0
	Tumour	km	GDC portal			Tumour	km	GDC portal
R132G: g/C	AML	1	0		R132L: c/A	AML	0	0
	BLCA	0	0			BLCA	0	0
	BRCA	0	0			BRCA	0	0
	CHOL	0	0			CHOL	0	0
	COAD	1	1			COAD	0	0
	GBM	2	1			GBM	0	0
	LGG	13	10			LGG	0	0
	LIHC	1	1			LIHC	0	0
	LUAD	0	0			LUAD	1	1
	PCPG	0	0			PCPG	0	0
	PRAD	1	1			PRAD	0	0
	SARC	0	0			SARC	0	0
	SKCM	0	0			SKCM	2	2
	THYM	0	0			THYM	0	0
	Tumour	km	GDC portal
R132S: g/T	AML	0	0
	BLCA	0	0
	BRCA	0	0
	CHOL	1	1
	COAD	0	0
	GBM	0	0
	LGG	8	9
	LIHC	0	0
	LUAD	0	0
	PCPG	0	0
	PRAD	0	0
	SARC	0	0
	SKCM	0	0
	THYM	0	0
