# Supplementary material for: Targeted variant detection using unaligned RNA-Seq reads
Source: Life Sci Alliance. 2019 Aug 19;2(4):e201900336. doi: 10.26508/lsa.201900336 (PMC6701478; doi:10.26508/lsa.201900336)
Supplement: Supplementary file 3 [file LSA-2019-00336_TableS3.xlsx]

## Sheet: Sheet 1
Suppl. table 3: Summary of all variants found by km, ITDassembler, Pindel and Genomon ITDetector on 28 TCGA AML samples for which exome and RNA sequencing were available.
Sample	Length	Type	km	cBio	ITDassembly	pIndel	Genomon
2812	51	-		✔️	✔️	✔️
2823	57	I&I	✔️		✔️	✔️
2823	72	ITD	✔️
2825	102	I&I	✔️	✔️		✔️
2830	42	-					✔️
2830	56	-				✔️
2830	69	I&I	✔️	✔️	✔️
2836	33	ITD	✔️	✔️	✔️
2840	18	ITD	✔️	✔️	✔️
2840	105	Indel	✔️
2844	87	I&I	✔️	✔️		✔️
2853	18	ITD	✔️	✔️	✔️
2853	105	Indel	✔️
2856	22	Indel	✔️
2862	69	-				✔️	✔️
2863	105	Indel	✔️
2869	54	ITD	✔️	✔️	✔️		✔️
2870	12	Indel	✔️	✔️
2871	63	ITD	✔️	✔️
2875	30	I&I	✔️	✔️	✔️		✔️
2877	18	ITD	✔️	✔️	✔️		✔️
2880	21	ITD	✔️	✔️	✔️		✔️
2895	45	ITD	✔️	✔️	✔️	✔️	✔️
2895	50	-				✔️
2895	51	I&I	✔️		✔️
2896	63	ITD	✔️
2896	153	-				✔️	✔️
2913	66	ITD	✔️	✔️		✔️	✔️
2915	49	-				✔️
2915	51	I&I	✔️	✔️	✔️		✔️
2918	21	ITD	✔️	✔️	✔️		✔️
2918	88	-				✔️	✔️
2918	90	I&I	✔️
2919	93	ITD	✔️			✔️	✔️
2921	24	I&I	✔️	✔️			✔️
2921	57	I&I	✔️				✔️
2925	42	ITD	✔️	✔️	✔️	✔️	✔️
2930	42	I&I	✔️	✔️			✔️
2931	70	-				✔️
2931	75	I&I	✔️	✔️
2934	56	-				✔️
2934	57	I&I	✔️	✔️	✔️		✔️
2942	24	ITD	✔️	✔️	✔️		✔️
2949	39	I&I	✔️		✔️
2959	118	-				✔️
2959	132	I&I	✔️
2965	72	I&I	✔️	✔️
2970	57	I&I	✔️	✔️
2976	18	I&I	✔️
2976	24	I&I	✔️	✔️
2980	21	ITD	✔️	✔️
2980	57	ITD	✔️
2981	54	I&I	✔️	✔️
2986	48	ITD	✔️	✔️
2988	36	-		✔️
2994	21	ITD	✔️	✔️
2998	21	-		✔️
2998	51	ITD	✔️
3007	21	-		✔️
3007	24	ITD	✔️
3007	57	ITD	✔️
